# Supplementary material for: Genomic Analysis of the Rare Slightly Halophilic Myxobacterium “Paraliomyxa miuraensis” SMH-27-4, the Producer of the Antibiotic Miuraenamide A
Source: MDPI journal article supplement (doi:10.3390/microorganisms11020371), 2023-02-01
Supplement: s1 [file s1]

## Supplementary Materials

### Genomic Analysis of the Rare Slightly Halophilic Myxobacterium “*Paraliomyxa miuraensis*” SMH-27-4, the Producer of the Antibiotic Miuraenamide A

Ying Liu and Makoto Ojika\*

Department of Applied Biosciences, Graduate School of Bioagricultural Sciences, Nagoya University, Nagoya 464-8601, Aichi, Japan

#### Contents

**Table S1.** Information of 16S rRNA genes used in Figure 2A.

**Table S2.** Information of genome sequences used in Figure 2B.

**Table S3.** Candidate secondary metabolite BGC regions identified with antiSMASH.

**Table S4.** RiPP protoclusters revealed by RiPPMiner.

**Table S5.** COG classification of the protein-coding genes of five strains in the family Nannocystaceae.

**Figure S1.** Locations of BGCs.

**Figure S2.** Chemical structures of the secondary metabolites described in Figure 4.

**Figure S3.** Organization of BGC1 and its related BGCs of other species.

**Figure S4.** Organization of BGC2 and its related BGCs of other species.

**Figure S5.** Organization of BGC3 and its related BGCs of other species.

**Figure S6.** Organization of BGC4 and its related BGCs of other species.

**Figure S7.** Organization of BGC5 and its related BGCs of other species.

**Reference S1.** Description of *Paraliomyxa* gen. nov./*Paraliomyxa miuraensis* sp. nov. (a part of ref. 14).

**Table S1.** Information of 16S rRNA genes used in Figure 2A .

| Strain                                                    | Accession number<br>of 16S rRNA gene | Length |
|-----------------------------------------------------------|--------------------------------------|--------|
| <i>Haliangium tepidum</i> DSM 14436 <sup>T</sup>          | NR_024781.1                          | 1508   |
| <i>Plesiocystis pacifica</i> SIR-1 <sup>T</sup>           | NR_024795.1                          | 1484   |
| <i>Enhygromyxa salina</i> DSM 15217 <sup>T</sup>          | NR_024807.1                          | 1480   |
| <i>Cystobacter ferrugineus</i> Cb fe18 <sup>T</sup>       | NR_025343.1                          | 1517   |
| <i>Chondromyces apiculatus</i> DSM 14605 <sup>T</sup>     | NR_025344.1                          | 1534   |
| <i>Chondromyces lanuginosus</i> DSM 14631 <sup>T</sup>    | NR_025345.1                          | 1535   |
| <i>Anaeromyxobacter dehalogenans</i> 2CP-1 <sup>T</sup>   | NR_027547.1                          | 1545   |
| <i>Nannocystis exedens</i> DSM 71 <sup>T</sup>            | NR_040928.1                          | 1480   |
| <i>Kofleria flava</i> DSM 14601 <sup>T</sup>              | NR_041981.1                          | 1498   |
| <i>Coralloccoccus exiguus</i> DSM 14696 <sup>T</sup>      | NR_042330.1                          | 1517   |
| <i>Byssovorax cruenta</i> DSM 14553 <sup>T</sup>          | NR_042341.1                          | 1529   |
| <i>Stigmatella erecta</i> DSM 16858 <sup>T</sup>          | NR_042398.1                          | 1534   |
| <i>Cystobacter armeniacae</i> DSM 14710 <sup>T</sup>      | NR_043939.1                          | 1491   |
| <i>Cystobacter badius</i> DSM 14723 <sup>T</sup>          | NR_043940.1                          | 1491   |
| <i>Cystobacter fuscus</i> DSM 2262 <sup>T</sup>           | NR_043941.1                          | 1491   |
| <i>Cystobacter miniatus</i> DSM 14712 <sup>T</sup>        | NR_043942.1                          | 1491   |
| <i>Archangium violaceum</i> Cb vi76 <sup>T</sup>          | NR_043943.1                          | 1489   |
| <i>Cystobacter velatus</i> DSM 14718 <sup>T</sup>         | NR_043944.1                          | 1491   |
| <i>Pyxidicoccus fallax</i> DSM 14698 <sup>T</sup>         | NR_043948.1                          | 1493   |
| <i>Hyalangium minutum</i> DSM 14724 <sup>T</sup>          | NR_043949.1                          | 1491   |
| <i>Stigmatella hybrida</i> DSM 14722 <sup>T</sup>         | NR_043952.1                          | 1502   |
| <i>Coralloccoccus coralloides</i> DSM 2259 <sup>T</sup>   | NR_074852.2                          | 1536   |
| <i>Haliangium ochraceum</i> DSM 14365 <sup>T</sup>        | NR_074917.1                          | 1544   |
| <i>Myxococcus stipitatus</i> DSM 14675 <sup>T</sup>       | NR_102512.2                          | 1535   |
| <i>Nannocystis pusilla</i> DSM 14622 <sup>T</sup>         | NR_104789.1                          | 1518   |
| <i>Desulfovibrio desulfuricans</i> Essex 6 <sup>T</sup>   | NR_104990.1                          | 1542   |
| <i>Myxococcus xanthus</i> DSM 16526 <sup>T</sup>          | NR_112544.1                          | 1463   |
| <i>Myxococcus fulvus</i> DSM 16525 <sup>T</sup>           | NR_112545.1                          | 1463   |
| <i>Myxococcus virescens</i> DSM 2260 <sup>T</sup>         | NR_112546.1                          | 1463   |
| <i>Pseudenhygromyxa salsuginis</i> DSM 21377 <sup>T</sup> | NR_113269.1                          | 1494   |
| <i>Cystobacter gracilis</i> DSM 14753 <sup>T</sup>        | NR_115862.1                          | 1491   |
| <i>Coralloccoccus macrosporus</i> DSM 14697 <sup>T</sup>  | NR_115865.1                          | 1493   |
| <i>Sorangium cellulosum</i> DSM 14627 <sup>T</sup>        | NR_116678.1                          | 1553   |
| <i>Archangium gephyra</i> DSM 2261 <sup>T</sup>           | NR_117459.1                          | 1482   |
| <i>Jahnella thaxteri</i> DSM 14626 <sup>T</sup>           | NR_117461.1                          | 1550   |
| <i>Archangium disciforme</i> DSM 52716 <sup>T</sup>       | NR_117600.1                          | 1528   |
| <i>Sandaracinus amylolyticus</i> DSM 53668 <sup>T</sup>   | NR_118001.1                          | 1506   |
| <i>Archangium minus</i> DSM 14751 <sup>T</sup>            | NR_125514.1                          | 1491   |
| <i>Vulgatibacter incomptus</i> DSM 27710 <sup>T</sup>     | NR_126181.1                          | 1479   |
| <i>Labilithrix luteola</i> DSM 27648 <sup>T</sup>         | NR_126182.1                          | 1483   |
| <i>Minicystis rosea</i> DSM 24000 <sup>T</sup>            | NR_134090.1                          | 1550   |
| <i>Aetherobacter fasciculatus</i> DSM 24601 <sup>T</sup>  | NR_148644.1                          | 1548   |
| <i>Aetherobacter rufus</i> DSM 24628 <sup>T</sup>         | NR_148645.1                          | 1551   |

|                                                         |             |      |
|---------------------------------------------------------|-------------|------|
| <i>Racemicystis crocea</i> DSM 100773 <sup>T</sup>      | NR_149306.1 | 1549 |
| <i>Racemicystis persica</i> DSM 103165 <sup>T</sup>     | NR_156102.1 | 1505 |
| <i>Vitiosangium cumulatum</i> DSM 102952 <sup>T</sup>   | NR_156939.1 | 1526 |
| <i>Vitiosangium subalbum</i> DSM 102953 <sup>T</sup>    | NR_156940.1 | 1528 |
| <i>Nannocystis konarekensis</i> DSM 104509 <sup>T</sup> | NR_159914.1 | 1499 |
| <i>Polyangium fumosum</i> DSM 14668 <sup>T</sup>        | NR_160522.1 | 1550 |
| <i>Polyangium sorediatum</i> DSM 14670 <sup>T</sup>     | NR_160536.1 | 1552 |
| <i>Polyangium spumosum</i> DSM 14734 <sup>T</sup>       | NR_160537.1 | 1553 |
| <i>Citreicoccus inhibens</i> M34 <sup>T</sup>           | NR_173636.1 | 1536 |

**Table S2.** Information of genome sequences used in Figure 2B.

| Strain                                                                                  | Assembly accession |
|-----------------------------------------------------------------------------------------|--------------------|
| <i>Anaeromyxobacter dehalogenans</i> 2CP-1 <sup>T</sup>                                 | GCF_000022145.1    |
| <i>Archangium gephyra</i> DSM 2261 <sup>T</sup>                                         | GCF_001027285.1    |
| <i>Archangium primigenium</i> ATCC 29037                                                | GCF_016904885.1    |
| <i>Archangium violaceum</i> Cb vi76 <sup>T</sup>                                        | GCF_000733295.1    |
| <i>Chondromyces apiculatus</i> DSM 436                                                  | GCF_000601485.1    |
| <i>Chondromyces crocatus</i> Cm c5 <sup>T</sup>                                         | GCF_001189295.1    |
| <i>Citreicoccus inhibens</i> M34 <sup>T</sup>                                           | GCF_019039035.1    |
| <i>Corallococcus aberystwythensis</i> AB050A <sup>T</sup>                               | GCF_003612165.1    |
| <i>Corallococcus carmarthensis</i> CA043D <sup>T</sup>                                  | GCF_003611695.1    |
| <i>Corallococcus coralloides</i> DSM 2259 <sup>T</sup>                                  | GCF_000255295.1    |
| <i>Corallococcus exercitus</i> AB043B <sup>T</sup>                                      | GCF_013116705.1    |
| <i>Corallococcus exiguus</i> NCCRE002                                                   | GCF_017302975.1    |
| <i>Corallococcus interemptor</i> AB047A <sup>T</sup>                                    | GCF_003668875.1    |
| <i>Corallococcus llansteffanensis</i> CA051B <sup>T</sup>                               | GCF_003612055.1    |
| <i>Corallococcus macrosporus</i> DSM 14697 <sup>T</sup>                                 | GCF_002305895.1    |
| <i>Corallococcus praedator</i> CA031B <sup>T</sup>                                      | GCF_003612125.1    |
| <i>Corallococcus sicarius</i> CA040B <sup>T</sup>                                       | GCF_003611735.1    |
| <i>Corallococcus silvisoli</i> c25j21 <sup>T</sup>                                      | GCF_009909145.1    |
| <i>Corallococcus soli</i> ZKHCC1 1396 <sup>T</sup>                                      | GCF_014930455.1    |
| <i>Corallococcus terminator</i> CA054A <sup>T</sup>                                     | GCF_003611635.1    |
| <i>Cystobacter ferrugineus</i> Cbfe23                                                   | GCF_001887355.1    |
| <i>Cystobacter fuscus</i> DSM 2262 <sup>T</sup>                                         | GCF_000335475.2    |
| <i>Cystobacter gracilis</i> DSM 14753 <sup>T</sup>                                      | GCF_020103725.1    |
| <i>Enhygromyxa salina</i> SWB007                                                        | GCF_002994635.1    |
| <i>Haliangium ochraceum</i> DSM 14365 <sup>T</sup>                                      | GCF_000024805.1    |
| <i>Hyalangium minutum</i> DSM 14724 <sup>T</sup>                                        | GCF_000737315.1    |
| <i>Labilithrix luteola</i> DSM 27648 <sup>T</sup>                                       | GCF_001263205.1    |
| <i>Melittangium boletus</i> DSM 14713 <sup>T</sup>                                      | GCF_002305855.1    |
| <i>Myxococcus eversor</i> AB053B <sup>T</sup>                                           | GCF_010894455.1    |
| <i>Myxococcus fulvus</i> DSM 16525 <sup>T</sup>                                         | GCF_900111765.1    |
| <i>Myxococcus hansupus</i> mixupus                                                      | GCF_000280925.3    |
| <i>Myxococcus</i>                                                                       |                    |
| <i>llanfairpwllgwyngyllgogerychwyrndrobwl'llantysiliogogochensis</i> AM401 <sup>T</sup> | GCF_006636215.1    |

|                                                         |                 |
|---------------------------------------------------------|-----------------|
| <i>Myxococcus stipitatus</i> DSM 14675 <sup>T</sup>     | GCF_000331735.1 |
| <i>Myxococcus vastator</i> AM301 <sup>T</sup>           | GCF_010894475.1 |
| <i>Myxococcus virescens</i> DSM 2260 <sup>T</sup>       | GCF_900101905.1 |
| <i>Myxococcus xanthus</i> DK 1622 <sup>T</sup>          | GCF_000012685.1 |
| <i>Nannocystis exedens</i> DSM 71 <sup>T</sup>          | GCF_002343915.1 |
| <i>Nannocystis pusilla</i> DSM 53165 <sup>T</sup>       | GCF_020073745.1 |
| <i>Plesiocystis pacifica</i> SIR-1 <sup>T</sup>         | GCF_000170895.1 |
| <i>Polyangium aurulentum</i> SDU3-1                     | GCF_005144635.2 |
| <i>Polyangium fumosum</i> DSM 14668 <sup>T</sup>        | GCF_005144585.1 |
| <i>Polyangium spumosum</i> DSM 14734 <sup>T</sup>       | GCF_009649845.1 |
| <i>Pyxidicoccus caerfyrddinensis</i> CA032A             | GCF_010894405.1 |
| <i>Pyxidicoccus fallax</i> DSM 14698 <sup>T</sup>       | GCF_012933655.1 |
| <i>Pyxidicoccus trucidator</i> CA060A                   | GCF_010894435.1 |
| <i>Sandaracinus amylolyticus</i> DSM 53668 <sup>T</sup> | GCF_000737325.1 |
| <i>Sorangium cellulosum</i> So ce56                     | GCF_000067165.1 |
| <i>Stigmatella aurantiaca</i> DSM 17044 <sup>T</sup>    | GCF_900109545.1 |
| <i>Stigmatella erecta</i> DSM 16858 <sup>T</sup>        | GCF_900111745.1 |
| <i>Stigmatella hybrida</i> DSM 14722 <sup>T</sup>       | GCF_020103775.1 |
| <i>Vulgatibacter incomptus</i> DSM 27710 <sup>T</sup>   | GCF_001263175.1 |

**Table S3.** Candidate secondary metabolite BGC regions identified with antiSMASH.

| Region    | Locus (contigs)   | Type                             | From   | To     |
|-----------|-------------------|----------------------------------|--------|--------|
| Region 1  | JAOVZF010000162.1 | T1PKS, NRPS                      | 272536 | 360088 |
| Region 2  | JAOVZF010000163.1 | NRPS, T1PKS                      | 507693 | 593915 |
| Region 3  | JAOVZF010000152.1 | NRPS, T1PKS                      | 276778 | 336871 |
| Region 4  | JAOVZF010000134.1 | siderophore                      | 46935  | 61490  |
| Region 5  | JAOVZF010000149.1 | terpene                          | 186818 | 209109 |
| Region 6  | JAOVZF010000161.1 | terpene                          | 243759 | 261662 |
| Region 7  | JAOVZF010000157.1 | terpene                          | 74778  | 96691  |
| Region 8  | JAOVZF010000161.1 | terpene                          | 376547 | 398295 |
| Region 9  | JAOVZF010000163.1 | RiPP-like                        | 304798 | 312818 |
| Region 10 | JAOVZF010000163.1 | RiPP-like                        | 470102 | 481025 |
| Region 11 | JAOVZF010000162.1 | RiPP-like                        | 203558 | 223128 |
| Region 12 | JAOVZF010000157.1 | RiPP-like                        | 162301 | 173182 |
| Region 13 | JAOVZF010000133.1 | RiPP-like                        | 94703  | 104650 |
| Region 14 | JAOVZF010000160.1 | RiPP-like                        | 84202  | 96013  |
| Region 15 | JAOVZF010000139.1 | RiPP-like                        | 7088   | 18050  |
| Region 16 | JAOVZF010000158.1 | RiPP-like                        | 403850 | 414788 |
| Region 17 | JAOVZF010000145.1 | thioamitides                     | 21637  | 44219  |
| Region 18 | JAOVZF010000139.1 | thioamitides                     | 85971  | 108523 |
| Region 19 | JAOVZF010000155.1 | thioamitides                     | 363283 | 385917 |
| Region 20 | JAOVZF010000159.1 | other                            | 55245  | 97845  |
| Region 21 | JAOVZF010000163.1 | RiPP-like, NRPS                  | 269655 | 313831 |
| Region 22 | JAOVZF010000151.1 | LAP, APE                         | 113265 | 184966 |
| Region 23 | JAOVZF010000164.1 | Class-I lanthipeptide, RiPP-like | 105469 | 134267 |
| Region 24 | JAOVZF010000162.1 | Class-I lanthipeptide            | 312593 | 342102 |

**Table S4.** RiPP BGCs revealed by RiPPMiner.

| Cluster   | Locus (contigs)   | RiPP class            | From   | To     |
|-----------|-------------------|-----------------------|--------|--------|
| Cluster 1 | JAOVZF010000146.1 | Glycocin              | 115465 | 174581 |
| Cluster 2 | JAOVZF010000146.1 | Head-to-tail cyclized | 178690 | 235768 |
| Cluster 3 | JAOVZF010000151.1 | Class-I lanthipeptide | 85529  | 149744 |
| Cluster 4 | JAOVZF010000163.1 | LAP                   | 86181  | 174179 |
| Cluster 5 | JAOVZF010000164.1 | Class-I lanthipeptide | 309536 | 377957 |

**Table S5.** COG classification of the protein-coding genes of five strains in the family Nannocystaceae.

| COG functional categories                                        | Number of genes*  |                    |                        |                  |                    |
|------------------------------------------------------------------|-------------------|--------------------|------------------------|------------------|--------------------|
|                                                                  | <i>N. exedens</i> | <i>P. sp. WMMC</i> | <i>"P. miuraensis"</i> | <i>E. salina</i> | <i>P. pacifica</i> |
|                                                                  | DSM 71            | 2535               | SMH-27-4               | DSM 1520         | SIR-1              |
| A: RNA processing and modification                               | 3                 | 0                  | 3                      | 1                | 2                  |
| C: Energy production and conversion                              | 200               | 17                 | 186                    | 169              | 165                |
| D: Cell cycle control, cell division, chromosome partitioning    | 59                | 82                 | 85                     | 79               | 72                 |
| E: Amino acid transport and metabolism                           | 166               | 156                | 174                    | 162              | 185                |
| F: Nucleotide transport and metabolism                           | 64                | 61                 | 63                     | 53               | 65                 |
| G: Carbohydrate transport and metabolism                         | 102               | 73                 | 98                     | 79               | 90                 |
| H: Coenzyme transport and metabolism                             | 158               | 154                | 151                    | 141              | 164                |
| I: Lipid transport and metabolism                                | 266               | 252                | 244                    | 260              | 256                |
| J: Translation, ribosomal structure and biogenesis               | 238               | 237                | 231                    | 222              | 215                |
| K: Transcription                                                 | 442               | 278                | 338                    | 257              | 381                |
| L: Replication, recombination and repair                         | 147               | 137                | 137                    | 138              | 118                |
| M: Cell wall/membrane/envelope biogenesis                        | 246               | 207                | 275                    | 224              | 215                |
| N: Cell motility                                                 | 20                | 21                 | 21                     | 22               | 18                 |
| O: Posttranslational modification, protein turnover, chaperones  | 255               | 229                | 263                    | 237              | 243                |
| P: Inorganic ion transport and metabolism                        | 139               | 125                | 121                    | 122              | 117                |
| Q: Secondary metabolites biosynthesis, transport and catabolism  | 90                | 60                 | 63                     | 81               | 74                 |
| T: Signal transduction mechanisms                                | 599               | 489                | 635                    | 474              | 490                |
| U: Intracellular trafficking, secretion, and vesicular transport | 54                | 60                 | 68                     | 56               | 45                 |
| V: Defense mechanisms                                            | 175               | 117                | 143                    | 135              | 112                |
| W: Extracellular structures                                      | 14                | 13                 | 21                     | 15               | 13                 |
| X: Mobilome: prophages, transposons                              | 105               | 35                 | 31                     | 24               | 35                 |
| Z: Cytoskeleton                                                  | 7                 | 17                 | 11                     | 16               | 8                  |
| R: General function prediction only                              | 387               | 354                | 461                    | 362              | 374                |
| S: Function unknown                                              | 84                | 61                 | 71                     | 63               | 61                 |

\*The numbers of genes were counted using in-house Python script and rounded to integers.

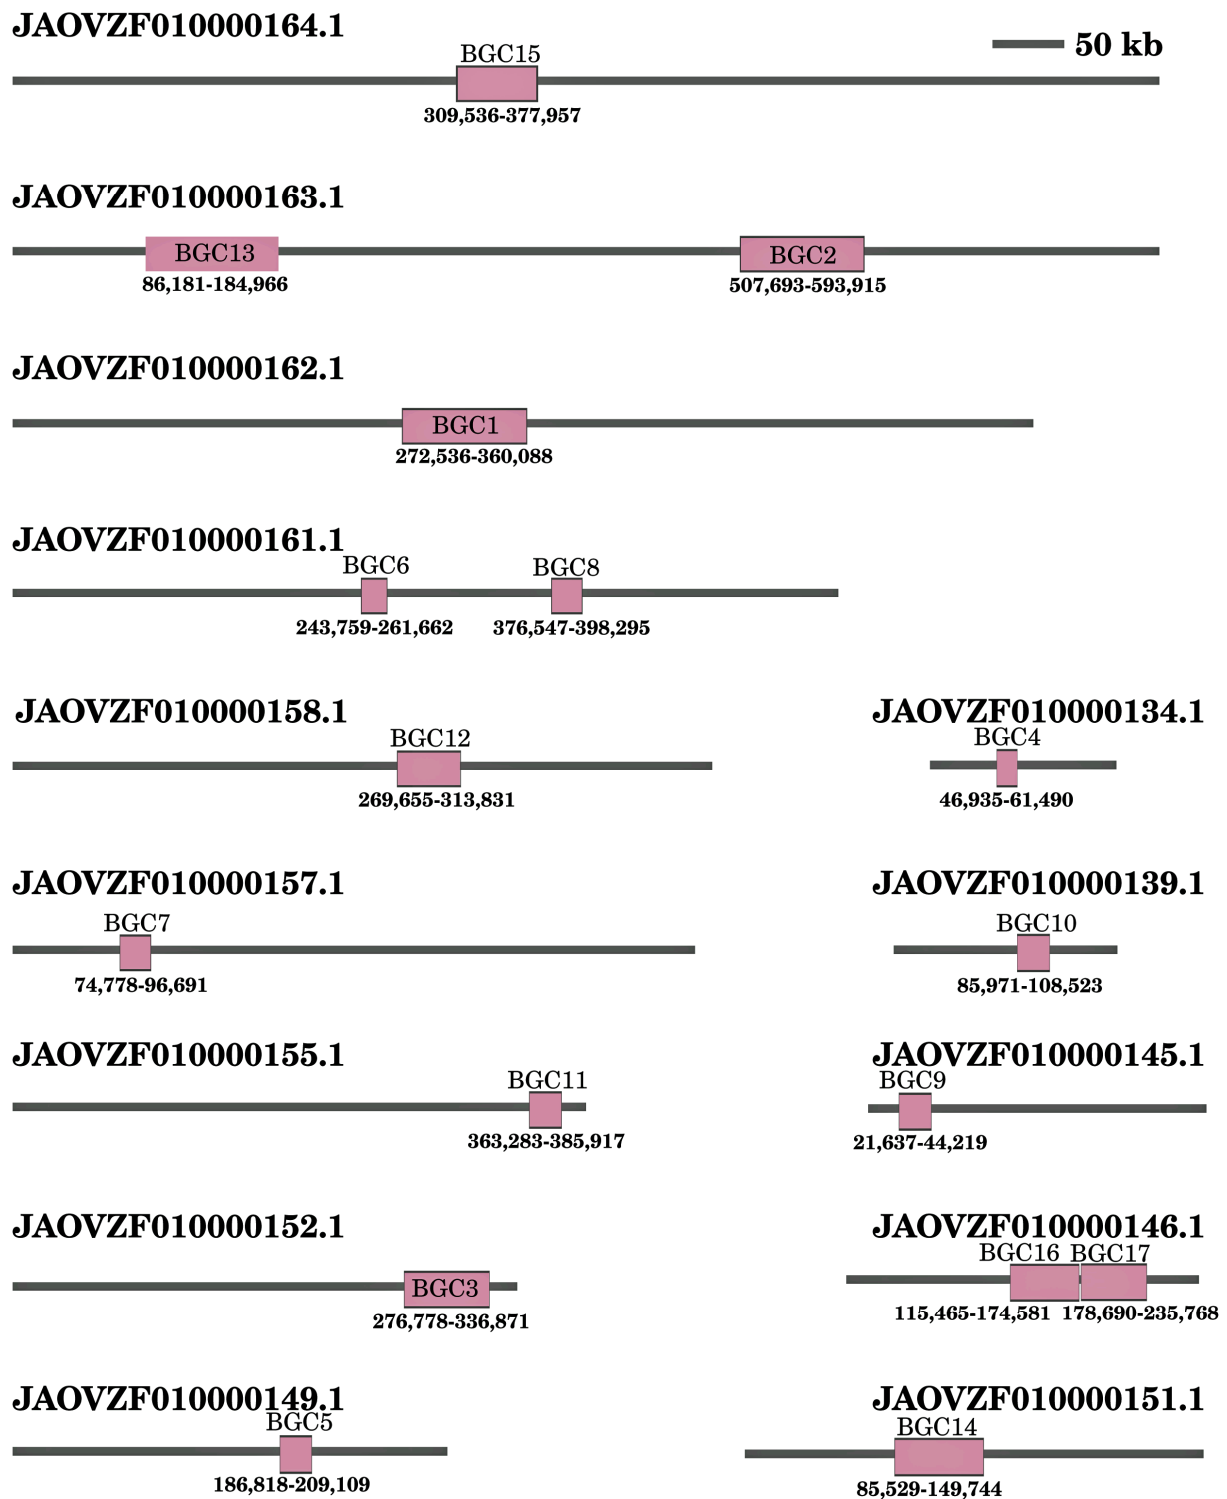

Figure S1. Locations of BGCs.

### structures of BGC1-related secondary metabolites

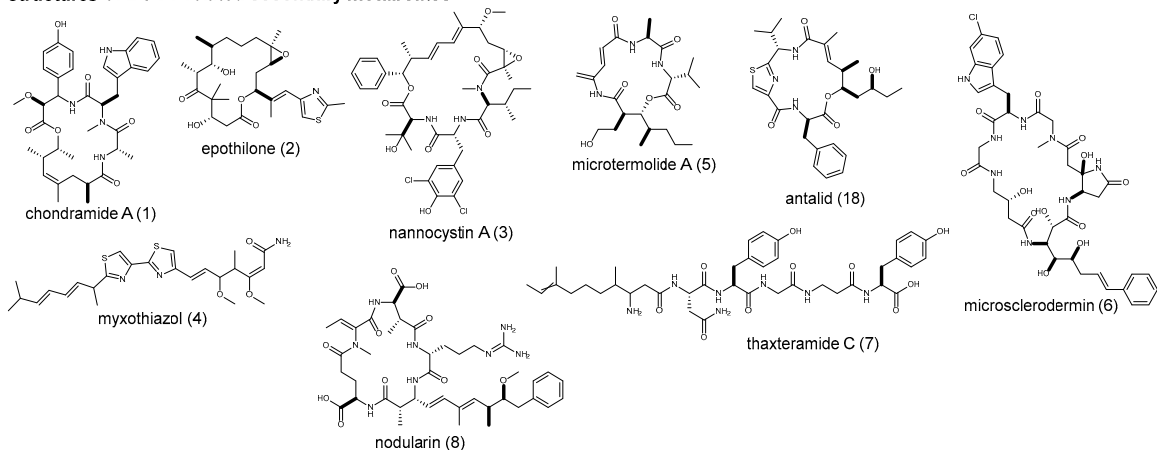

### structures of BGC2-related secondary metabolites

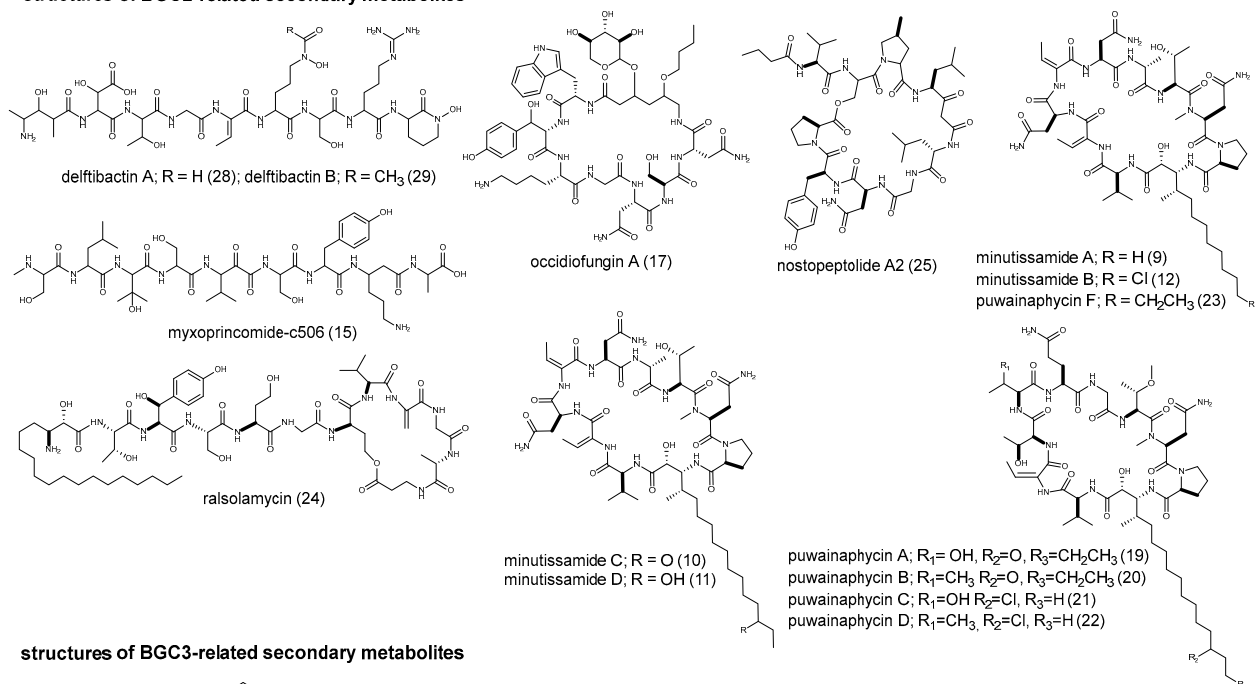

### structures of BGC3-related secondary metabolites

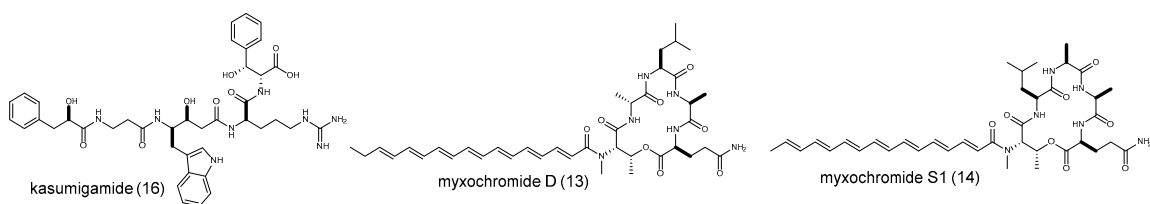

### structures of BGC4-related secondary metabolites

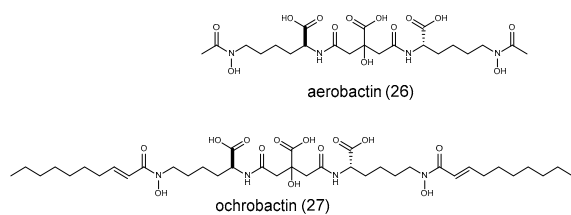

### structures of BGC5-related secondary metabolites

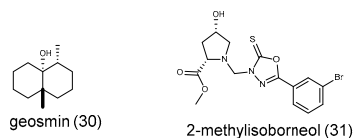

**Figure S2.** Chemical structures of the secondary metabolites described in Figure 4.

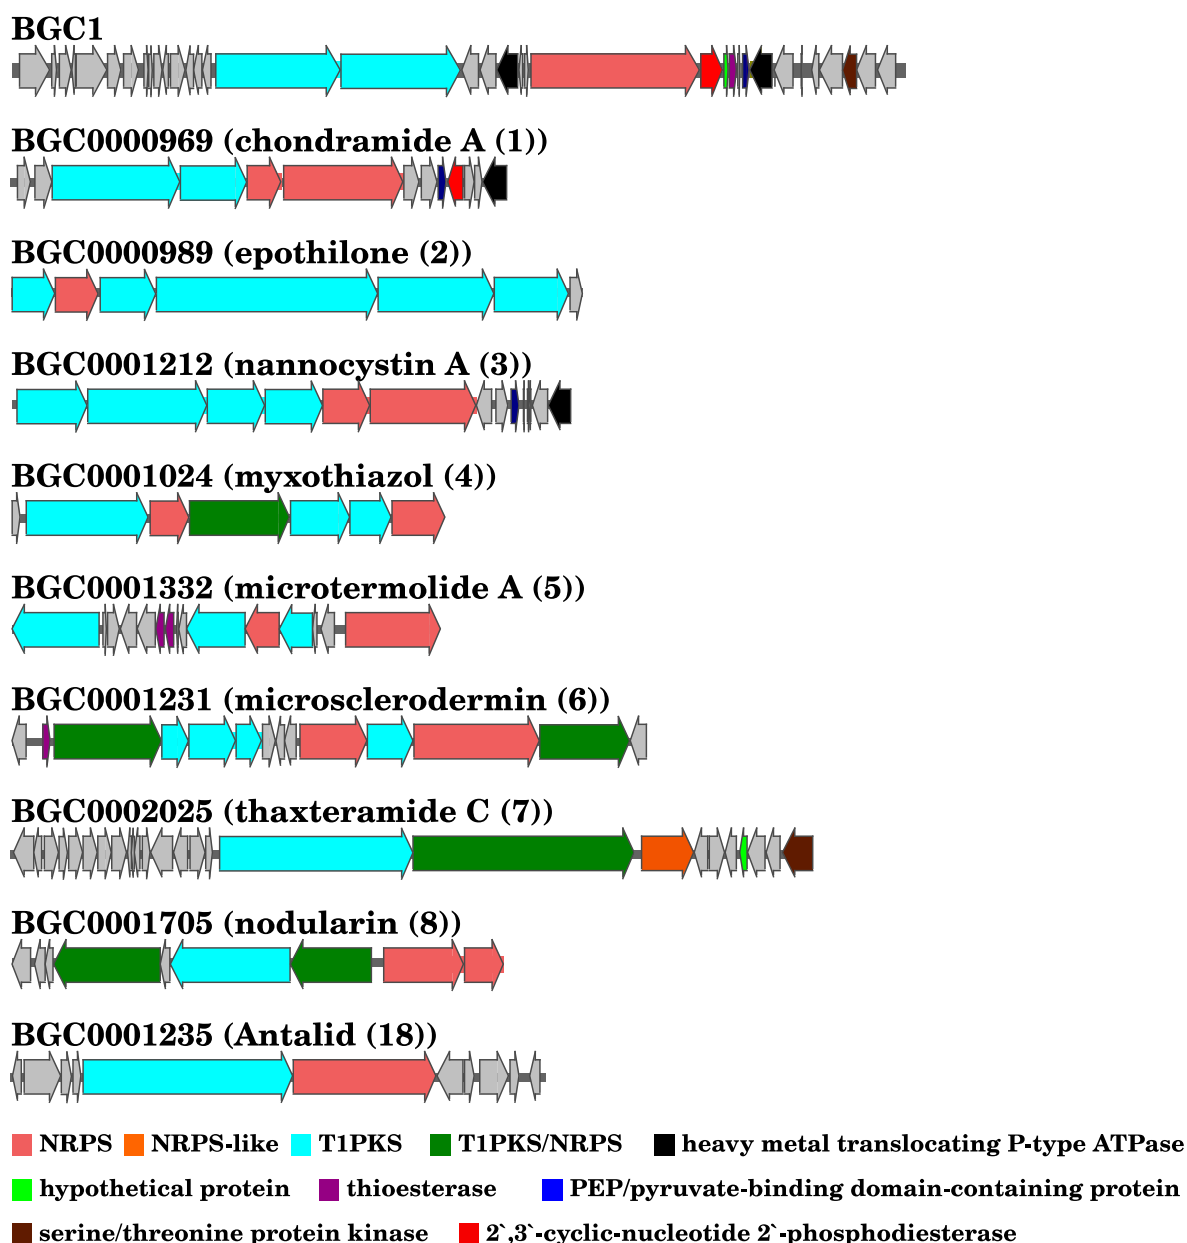

**Figure S3.** Organizations of BGC1 and its related BGCs of other species. PKS and NRPS related genes (NRPS, NRPS-like, T1PKS, and T1PKS/NRPS) are colored by their types. The other colored genes (except grey) are based on blastp results (e-value  $\leq 10^{-10}$ , identity  $\geq 30\%$ ).

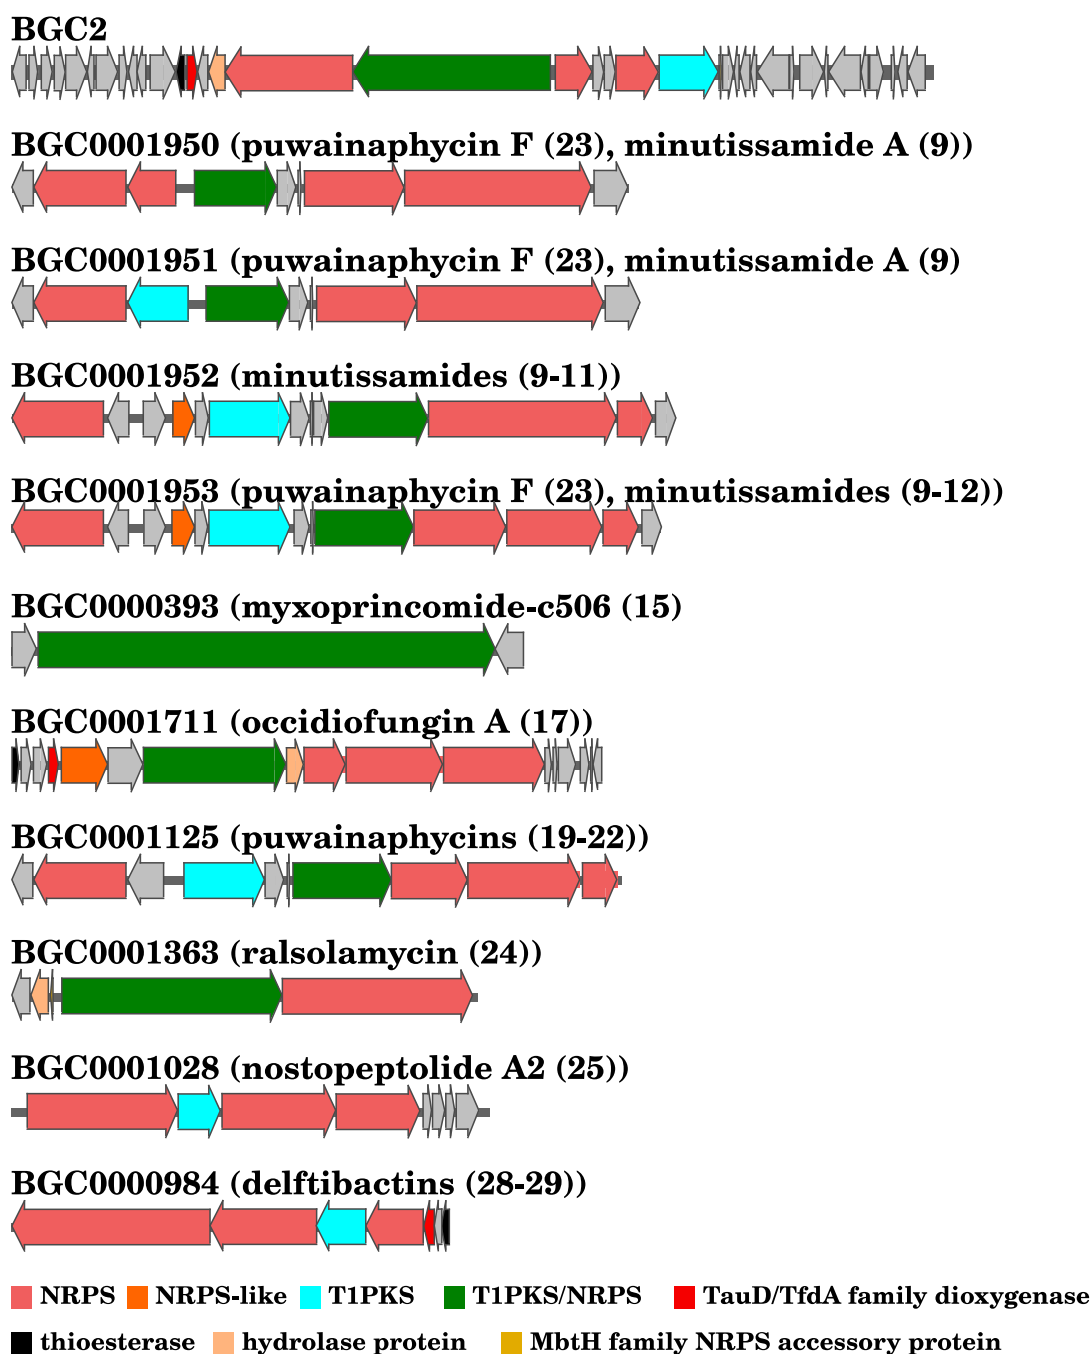

**Figure S4.** Organizations of BGC2 and its related BGCs of other species. PKS and NRPS related genes (NRPS, NRPS-like, T1PKS, and T1PKS/NRPS) are colored by their types. The other colored genes (except grey) are based on blastp results (e-value  $\leq 10^{-10}$ , identity  $\geq 30\%$ ).

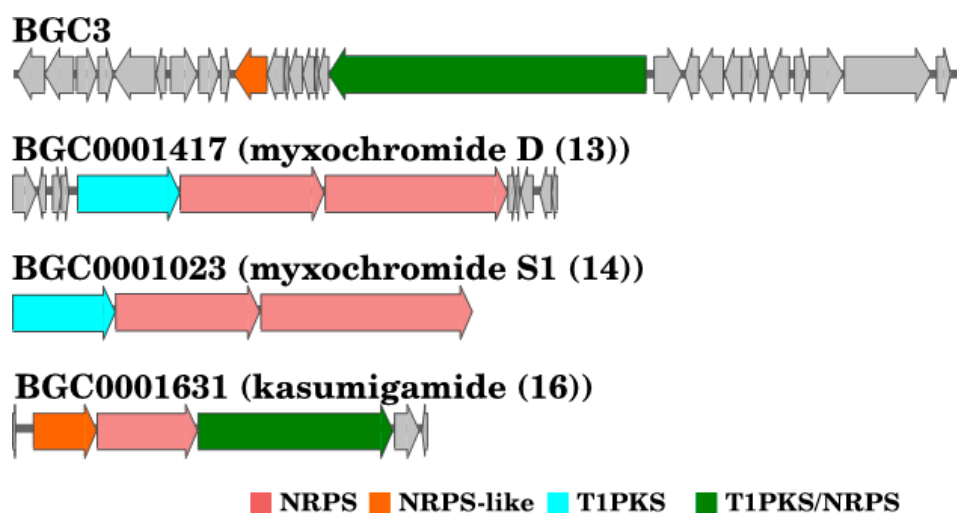

**Figure S5.** Organizations of BGC3 and its related BGCs of other species. PKS and NRPS related genes (NRPS, NRPS-like, T1PKS, and T1PKS/NRPS) are colored by their types. The other colored genes (except grey) are based on blastp results (e-value  $\leq 10^{-10}$ , identity  $\geq 30\%$ ).

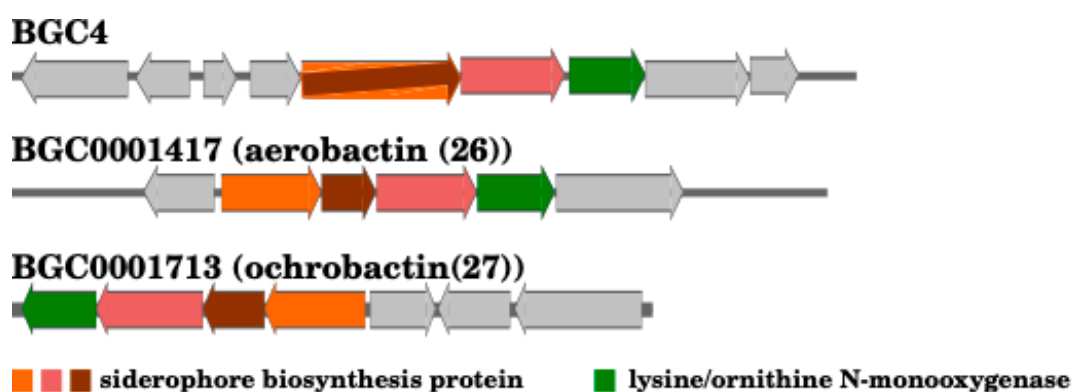

**Figure S6.** Organizations of BGC4 and its related BGCs of other species. Genes are colored (except grey) based on blastp results (e-value  $\leq 10^{-10}$ , identity  $\geq 30\%$ ).

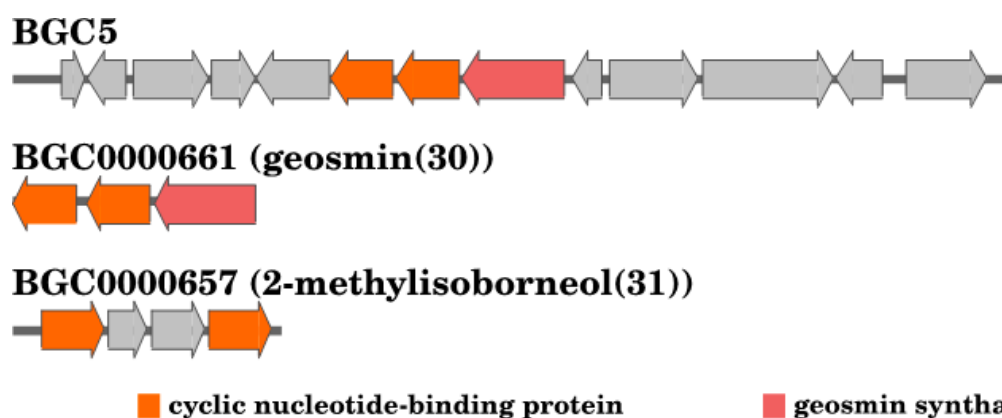

**Figure S7.** Organizations of BGC6 and its related BGCs of other species. Genes are colored (except grey) based on blastp results (e-value  $\leq 10^{-10}$ , identity  $\geq 30\%$ ).

**Reference S1** (a part of ref. 14, p86-87)

*Description of Paraliomyxa gen. nov.*

Paraliomyxa [Paralio.myxa. Gr. adj. paralio growing or living in costal environment, Gr. Fem. N. myxa slime; N. L. fem. N. Paraliomyxa slim of costal habitat, that means coastal myxobacteria]. Cells are rod-shaped, move by gliding and form swarms on agar media. Fruiting body (FB)-like structures and myxospore-like optically refractive cells are formed. Mesophilic bacterium which grows between 18-40 °C. Requires lower concentration of NaCl than the average seawater level for the growth. Grows at neutral pH range. The fatty acid profile is characterized by major amount of BCFAs and minor amount of SCFAs, when cultured in N0.5-S20-10 liquid medium. PUFAs are not found among cellular FAs. The major cellular quinone is MK-8. The DNA G + C content of the type strain of the species is 69-70 mol %. As shown by 16S rRNA gene sequence analysis, the genus belongs to the suborder Nannocystineae, the order Myxococcales, the class Deltaproteobacteria. The phylogenetic position of the genus is distantly related to the genus Enhygromyxa and the genus Plesiocystis. The type species is Paraliomyxa miuraensis.

*Description of Paraliomyxa miuraensis sp. nov.*

Cells are gliding rods, measuring 0.5-0.8 x 2.0-5.0 µm. In addition to the characteristics reported above in the genus description, type strain was found to produce the novel antifungal depsipeptides: miuraenamides. The strain required very low concentration of NaCl for the growth. No distinct fruiting body was observed for the strain. The major cellular quinone was MK-8, and the major cellular fatty acid components were iso acids (iso-C15:0 and iso-C17:0). Long chain PUFAs (poly unsaturated fatty acids) and hydroxy fatty acids were not detected. Caseinase was detected but amylase was not. On the basis of phylogenetic, chemotaxonomic and physiological data, Paraliomyxa miuraensis gen. nov., sp. nov. is proposed. Mesophilic bacterium, no growth occurs above 40 °C or below 15 °C. NaCl concentration range for the growth is between 0.0-3.0% (w/v), with an optimum at 0.5-1.5%. No growth in higher NaCl concentration than 3.5% (w/v). It requires both Mg<sup>2+</sup> and Ca<sup>2+</sup> for the growth, and does not grow in VY/2 agar for terrestrial myxobacteria. The optimum growth pH range is pH 7.0-7.5. No growth below pH 5.5 or above pH 8.5. Oxidase was positive but catalase was weak or negative. Colonies are Congo-red-negative. Aerobic. It decomposes live E. coli cells, but does not lyse autoclaved yeast cells. Caseinase and gelatinase are positive. The strain is rather oligotrophic, and grows in CY/6-S75-15 medium but not in CY/3-S75-15. Does not utilize nitrate as nitrogen source. Amylase is negative. Does not degrade filter paper. It sometimes cleaves the agar gel matrix within the swarm area, but does not completely liquify agar gel. Tween 80 lipase and DNAase are negative. The major cellular fatty acids are iso-C15:0 (29.5%) and iso-C17:0 (33.5%). Iso-C15:1 (8.0%) and iso-C16:0 (3.3%) were also detected. It lacks anteiso-acids, long chain PUFAs and hydroxylated acids. The type strain is SMH-27-4T.
